# Supplementary material for: Tumor suppressor role of miR-3622b-5p in ERBB2-positive cancer
Source: PubMed Central journal article supplement (PMC5410281; doi:10.18632/oncotarget.14968), 2017-02-01
Supplement: oncotarget-08-23008-s001.pdf [file oncotarget-08-23008-s001.pdf]

## Tumor suppressor role of miR-3622b-5p in ERBB2-positive cancer

### SUPPLEMENTARY FIGURES

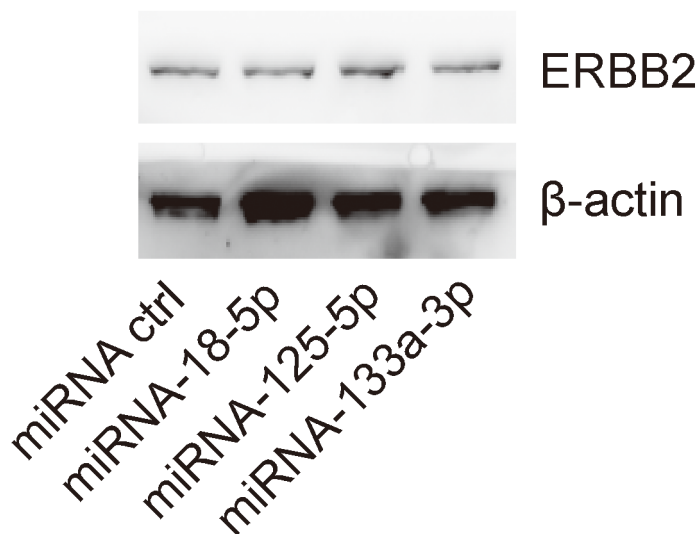

**Supplementary Figure 1: The overexpression of miR-18-5p, miR-125-5p or miR-133a-3p do not alter the expression level of ERBB2.** Western blot analysis showing unaltered protein levels of ERBB2 in SNU-216 gastric cancer cells after miR-18-5p, miR-125-5p or miR-133a-3p overexpression.  $\beta$ -actin as the internal control.

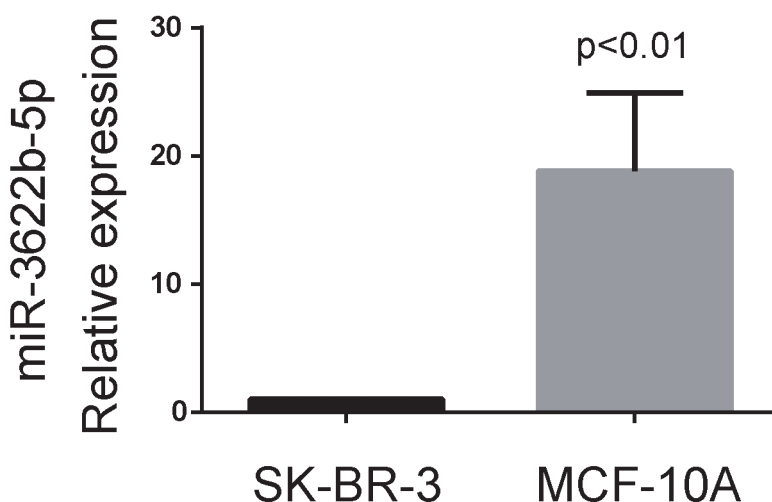

**Supplementary Figure 2: MiR-3622b-5p is down-regulated in ERBB2-positive breast cancer cells.** The miR-3622-5p expression is suppressed in SK-BR-3 ERBB2-positive breast cancer cells when compared to that in MCF-10A normal human mammary epithelial cells. The miRNA relative expression levels were normalized to the average value of SK-BR-3 breast cancer cells.
